# Supplementary material for: Polymorphisms in the Gene Encoding Caspase 8 May Predict the Response to First-Line Platinum-Based Chemotherapy in Locally Advanced or Advanced Non-Small-Cell Lung Cancer
Source: MDPI journal article supplement (doi:10.3390/jcm10051126), 2021-03-08
Supplement: s1 [file s1]

**Supplementary Table 1.** Comparisons of data distribution according to different study group sets.

| Variable                           |            | Study group<br>(n=99) | Patients included in<br>the 1 <sup>st</sup> evaluation of<br>objective response<br>(n=74) | <i>p</i><br>(vs study<br>group) | Patients included in<br>the 2 <sup>nd</sup> evaluation of<br>objective response<br>(n=50) | <i>p</i><br>(vs study<br>group) | Patients included<br>in the survival<br>analysis<br>(n=89) | <i>p</i><br>(vs study<br>group) |
|------------------------------------|------------|-----------------------|-------------------------------------------------------------------------------------------|---------------------------------|-------------------------------------------------------------------------------------------|---------------------------------|------------------------------------------------------------|---------------------------------|
| Gender                             | Male       | 76 (76.77%)           | 60 (81.08%)                                                                               | 0.5756                          | 42 (84.00%)                                                                               | 0.3939                          | 70 (78.65%)                                                | 0.8611                          |
|                                    | Female     | 23 (23.23%)           | 14 (18.92%)                                                                               |                                 | 8 (16.00%)                                                                                |                                 | 19 (21.35%)                                                |                                 |
| Age                                | ≥ 66.5     | 49 (49.50%)           | 32 (43.24%)                                                                               | 0.4442                          | 19 (38.00%)                                                                               | 0.2236                          | 44 (49.44%)                                                | 1.0000                          |
|                                    | < 66.5     | 50 (50.50%)           | 42 (56.76%)                                                                               |                                 | 31 (62.00%)                                                                               |                                 | 45 (50.56%)                                                |                                 |
| Disease stage                      | III        | 35(35.35%)            | 28 (37.84%)                                                                               | 0.7519                          | 21 (42.00%)                                                                               | 0.4758                          | 29 (32.58%)                                                | 0.7585                          |
|                                    | IVA        | 64 (64.65%)           | 46 (62.16%)                                                                               |                                 | 29 (58.00%)                                                                               |                                 | 60 (67.42%)                                                |                                 |
| Performance status (ECOG<br>score) | 0          | 17 (17.17)            | 11 (14.86%)                                                                               | 0.8352                          | 9 (18.00%)                                                                                | 1.0000                          | 8 (8.99%)                                                  | 0.1320                          |
|                                    | 1 and 2    | 82 (82.83%)           | 63 (85.14%)                                                                               |                                 | 41 (82.00%)                                                                               |                                 | 81 (91.01%)                                                |                                 |
| Smoking status                     | Smoker     | 92 (92.93%)           | 69 (93.24%)                                                                               | 1.0000                          | 47 (94.00%)                                                                               | 1.0000                          | 84 (8.99%)                                                 | 0.3408                          |
|                                    | Non-smoker | 7 (7.07%)             | 5 (6.76%)                                                                                 |                                 | 3 (6.00%)                                                                                 |                                 | 3 (91.01%)                                                 |                                 |
| Pack years                         | ≥ 45       | 45 (45.45%)           | 36 (48.65%)                                                                               | 0.7584                          | 23 (46.00%)                                                                               | 1.0000                          | 43 (48.31%)                                                | 0.7701                          |
|                                    | < 45       | 54 (54.55%)           | 38 (51.35%)                                                                               |                                 | 27 (54.00%)                                                                               |                                 | 46 (51.69%)                                                |                                 |
| I line chemotherapy (I)            | Cis + PEM  | 23 (23.23%)           | 17 (22.97%)                                                                               | 1.0000                          | 13 (26.00%)                                                                               | 0.2818                          | 22 (24.72%)                                                | 0.8849                          |
|                                    | Other      | 76 (76.77%)           | 57 (77.03%)                                                                               |                                 | 26 (74.00%)                                                                               |                                 | 67 (75.28%)                                                |                                 |
| I line chemotherapy (II)           | PN         | 60 (60.60%)           | 48 (64.86%)                                                                               | 0.6351                          | 32 (64.00%)                                                                               | 0.7241                          | 55 (61.80%)                                                | 0.8820                          |
|                                    | Other      | 39 (49.40%)           | 26 (35.14%)                                                                               |                                 | 18 (36.00%)                                                                               |                                 | 34 (38.20%)                                                |                                 |
| I line chemotherapy (III)          | PG         | 16 (16.16%)           | 7 (9.46%)                                                                                 | 0.2593                          | 3 (6.00%)                                                                                 | 0.1172                          | 13 (14.61%)                                                | 0.8411                          |
|                                    | Other      | 83 (83.84%)           | 67 (90.54%)                                                                               |                                 | 47 (94.00%)                                                                               |                                 | 76 (85.39%)                                                |                                 |
| Distant metastases                 | No         | 43 (43.43%)           | 23 (31.02%)                                                                               | 0.1147                          | 17 (34.00%)                                                                               | 0.2930                          | 35 (39.32%)                                                | 0.6568                          |
|                                    | Yes        | 56 (56.57%)           | 51 (68.92%)                                                                               |                                 | 33 (66.00%)                                                                               |                                 | 54 (60.68%)                                                |                                 |
| Weight                             | ≥ 74       | 49 (49.49%)           | 34 (45.94%)                                                                               | 0.6485                          | 27 (54.00%)                                                                               | 0.7287                          | 43 (48.31%)                                                | 0.8849                          |
|                                    | < 74       | 50 (50.51%)           | 40 (54.06%)                                                                               |                                 | 23 (46.00%)                                                                               |                                 | 46 (51.69%)                                                |                                 |

|                                         |             |             |             |        |             |         |             |        |
|-----------------------------------------|-------------|-------------|-------------|--------|-------------|---------|-------------|--------|
| BMI                                     | ≥ 24.91     | 49 (49.49%) | 33 (44.59%) | 0.5417 | 27 (54.00%) | 0.7287  | 43 (48.31%) | 0.8849 |
|                                         | <24.91      | 50 (50.51%) | 41 (55.41%) |        | 23 (46.00%) |         | 46 (51.69%) |        |
| Body loss (%)                           | ≥ 9.84      | 32 (32.32%) | 25 (33.78%) | 0.8711 | 15 (30.00%) | 0.8529  | 28 (31.46%) | 1.0000 |
|                                         | < 9.84      | 67 (67.68%) | 49 (66.22%) |        | 35 (70.00%) |         | 61 (68.54%) |        |
| Time from diagnosis to treatment (days) | ≥ 17        | 48 (48.48%) | 25 (33.78%) | 0.2618 | 25 (50.00%) | 0.8643  | 44 (49.44%) | 1.0000 |
|                                         | <17         | 51 (51.52%) | 39 (66.22%) |        | 25 (50.00%) |         | 45 (50.56%) |        |
| Occupational exposure                   | No          | 55 (79.71%) | 55 (74.32%) | 1.0000 | 38 (76.00%) | 0.6583  | 50 (56.18%) | 1.0000 |
|                                         | Yes         | 14 (20.29%) | 14 (25.68%) |        | 12 (24.00%) |         | 13 (43.82%) |        |
| Family history of malignancy (any)      | No          | 46 (46.46%) | 36 (48.65%) | 0.8778 | 23 (46.00%) | 1.0000  | 42 (47.19%) | 1.0000 |
|                                         | Yes         | 53 (53.54%) | 38 (51.35%) |        | 27 (54.00%) |         | 47 (52.81%) |        |
| Family history of malignancy (lung)     | No          | 75 (75.76%) | 54 (72.97%) | 0.7258 | 14 (28.00%) | 0.0299* | 68 (76.40%) | 1.0000 |
|                                         | Yes         | 24 (24.24%) | 20 (27.03%) |        | 13 (72.00%) |         | 21 (23.60%) |        |
| Histopathology (I)                      | AC          | 40 (40.40%) | 29 (39.19%) | 0.8769 | 18 (36.00%) | 0.7222  | 34 (38.20%) | 0.7673 |
|                                         | SCC and NOS | 59 (59.60%) | 45 (60.81%) |        | 32 (64.00%) |         | 55 (61.80%) |        |
| Histopathology (II)                     | SCC         | 52 (52.53%) | 40 (54.05%) | 0.8784 | 27 (54.00%) | 1.0000  | 45 (50.56%) | 0.8839 |
|                                         | AC and NOS  | 47 (47.47%) | 34 (45.95%) |        | 23 (46.00%) |         | 44 (49.44%) |        |
| CASP-8 (rs3769818)                      | AA          | 8 (8.08%)   | 7 (9.46%)   | 0.7895 | 3 (6.00%)   | 0.7514  | 7 (7.86%)   | 1.0000 |
|                                         | AG and GG   | 91 (91.92%) | 67 (90.54%) |        | 47 (94.00%) |         | 82 (92.14%) |        |
| CASP-8 (rs3769818)                      | AG          | 38 (38.38%) | 28 (37.84%) | 1.0000 | 19 (38.00%) | 1.0000  | 25 (28.10%) | 0.1641 |
|                                         | AA and GG   | 61 (61.62%) | 46 (62.16%) |        | 31 (62.00%) |         | 64 (71.90%) |        |
| CASP-8 (rs3769818)                      | GG          | 53 (55.21%) | 39 (52.70%) | 1.0000 | 24 (48.00%) | 0.6032  | 57 (64.04%) | 0.1821 |
|                                         | AG and AA   | 46 (44.79%) | 35 (47.30%) |        | 26 (52.00%) |         | 32 (35.96%) |        |

Abbreviations: AC - adenocarcinoma; BMI - body mass index; Cis - Cisplatin; NOS - not otherwise specified; OR - odds ratio; SCC - squamous cell carcinoma; PEM - Pemetrexed; PG - Cisplatin+Gemcytabine PN - Cisplatin+Vinorelbine.

\* - statistically significant result.
